# Supplementary material for: Synthesis, Radiolabeling, and In Vitro and In Vivo Characterization of Heterobivalent Peptidic Agents for Bispecific EGFR and Integrin αvβ3 Targeting
Source: PubMed Central journal article supplement — ACS Omega. 2023 Jan 4;8(2):2793–807. doi: 10.1021/acsomega.2c07484 (PMC9850772; doi:10.1021/acsomega.2c07484), 2023-01-04
Supplement: ao2c07484_si_001.pdf [file ao2c07484_si_001.pdf]

# Synthesis, Radiolabeling, in Vitro and in Vivo Characterization of Heterobivalent Peptidic Agents for bispecific EGFR and Integrin $\alpha_v\beta_3$ Targeting

**Diana Braun,<sup>1,2</sup> Benedikt Judmann,<sup>1,2</sup> Xia Cheng,<sup>2</sup> Björn Wängler,<sup>2</sup> Ralf Schirmacher,<sup>3</sup> Gert Fricker,<sup>4</sup> and Carmen Wängler<sup>1\*</sup>**

<sup>1</sup> Biomedical Chemistry, Clinic of Radiology and Nuclear Medicine, Medical Faculty Mannheim, Heidelberg University, 68167 Mannheim, Germany

<sup>2</sup> Molecular Imaging and Radiochemistry, Clinic of Radiology and Nuclear Medicine, Medical Faculty Mannheim, Heidelberg University, 68167 Mannheim, Germany

<sup>3</sup> Department of Oncology, Division of Oncological Imaging, University of Alberta, Edmonton, AB T6G 1Z2, Canada

<sup>4</sup> Institute of Pharmacy and Molecular Biotechnology, University of Heidelberg, 69120 Heidelberg, Germany

\* Correspondence should be addressed to: [Carmen.Waengler@medma.uni-heidelberg.de](mailto:Carmen.Waengler@medma.uni-heidelberg.de)

<sup>†</sup> Both authors contributed equally to this work

## CONTENT

Mass spectra of **1**, **2** and **4 – 12** pages S2 – S5

Table S1: *Ex vivo* biodistribution data (% ID/g) at 120 min p.i. of [<sup>68</sup>Ga]Ga-**1** without blocking or with blocking of integrin  $\alpha_v\beta_3$  or EGF receptors page S5

## Mass spectra of 1, 2 and 4 – 12

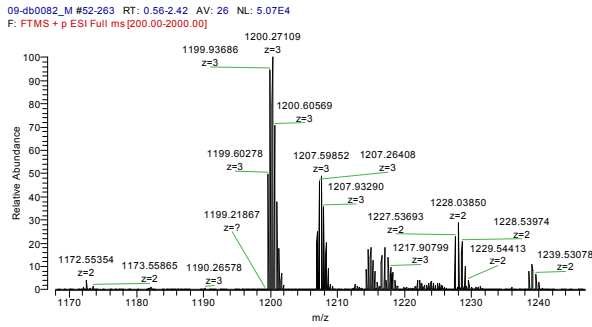

Figure S1: Mass spectrum of HBPL 1 (NODA-GA-PEG<sub>3</sub>-GE11-PEG<sub>3</sub>-c(RGDyK)) (1).

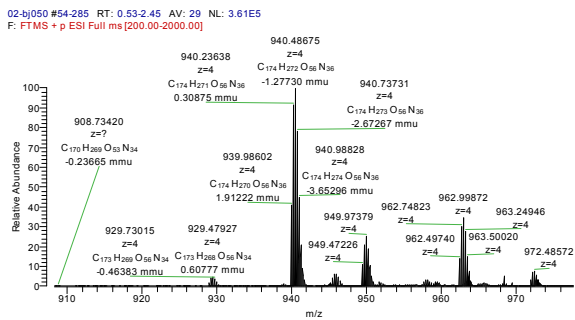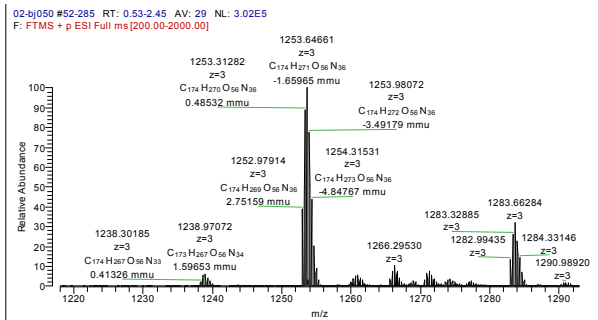

Figure S2: Mass spectrum of HBPL 2 (NODA-GA-PEG<sub>5</sub>-GE11-PEG<sub>5</sub>-c(RGDfK)) (2).

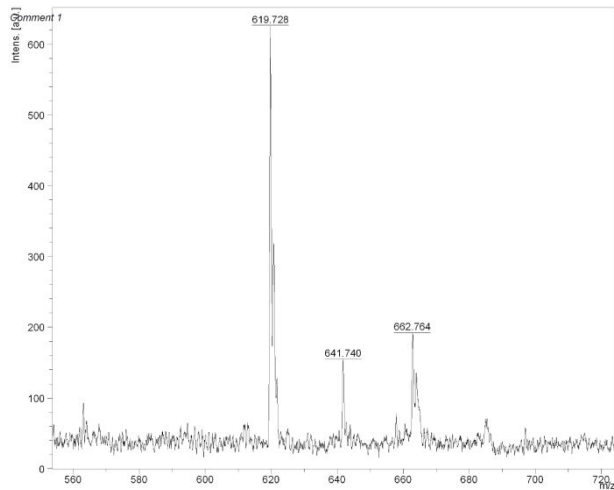

Figure S3: Mass spectrum of c(RGDyK) (4).

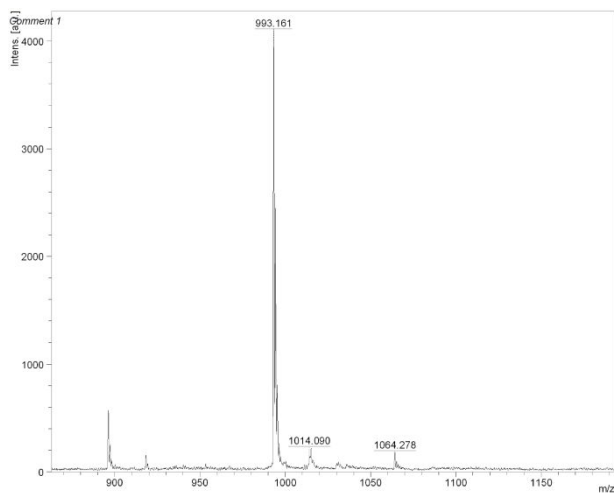

Figure S4: Mass spectrum of c(RGDyK)-PEG<sub>3</sub>-NHS ester (5).

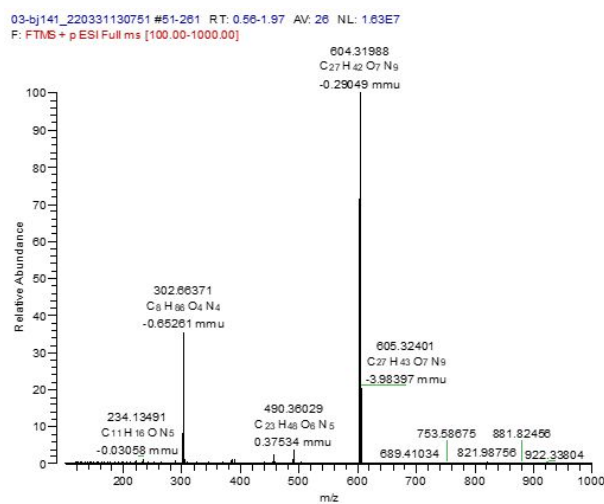

Figure S5: Mass spectrum of c(RGDfK) (6).

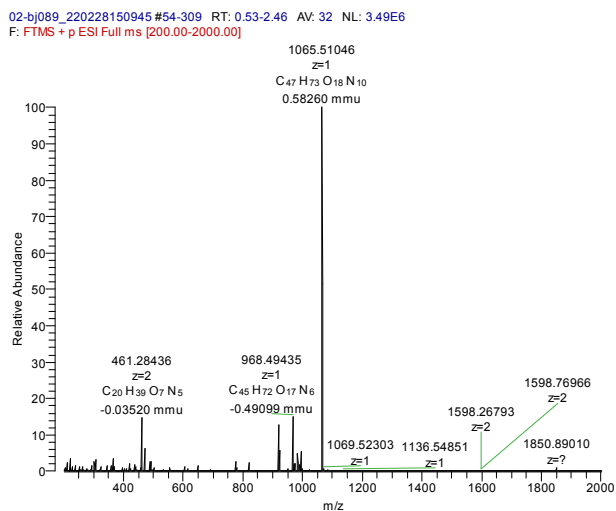

Figure S6: Mass spectrum of c(RGDfK)-PEG<sub>5</sub>-NHS ester (7).

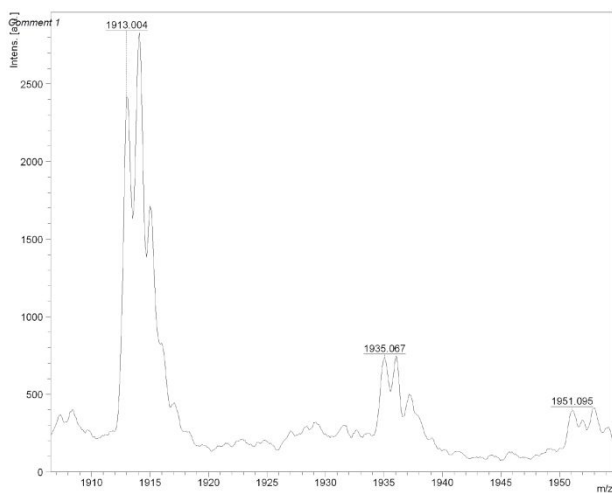

Figure S7: Mass spectrum of GE11-PEG<sub>3</sub>-NHS ester (8).

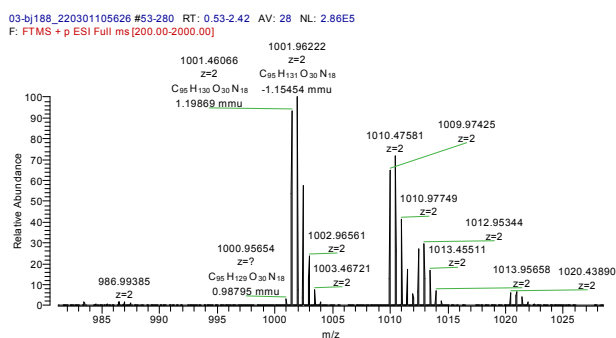

Figure S8: Mass spectrum of GE11-PEG<sub>5</sub>-NHS ester (9).

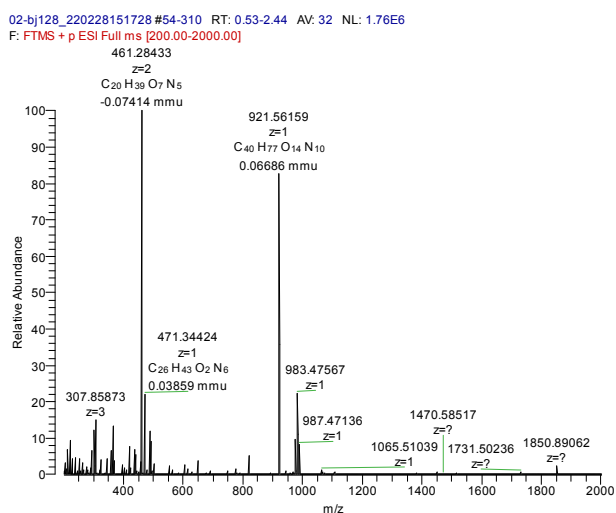

Figure S9: Mass spectrum of NODA-GA-bis-amino dendron (10).

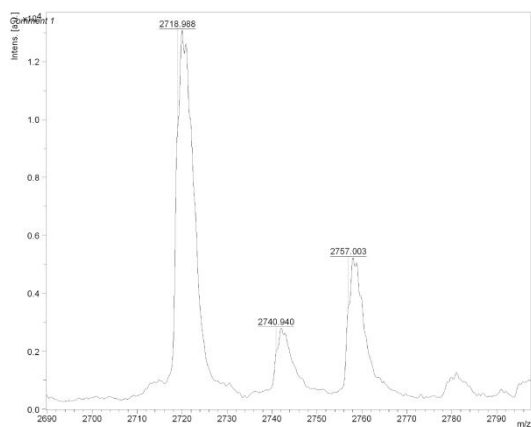

Figure S10: Mass spectrum of HBPL Intermediate 1 (NODA-GA-*mono*-amino-PEG<sub>3</sub>-GE11 dendron) (**11**).

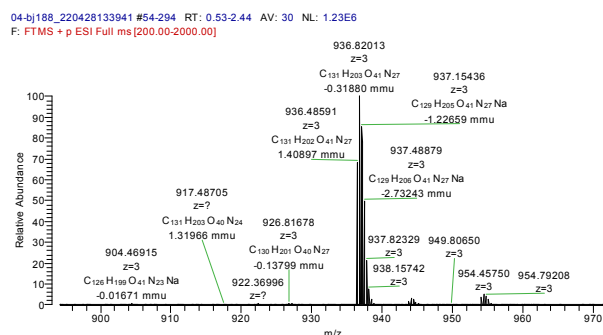

Figure S11: Mass spectrum of HBPL Intermediate 2 (NODA-GA-*mono*-amino-PEG<sub>5</sub>-GE11 dendron) (**12**).

Table S1: *Ex vivo* biodistribution data (% ID/g) at 120 min p.i. of [<sup>68</sup>Ga]Ga-**1** without blocking or with blocking of integrin  $\alpha_v\beta_3$  or EGFR receptors.

| Organ           | [ <sup>68</sup> Ga]Ga- <b>1</b> | [ <sup>68</sup> Ga]Ga- <b>1</b><br>+ integrin $\alpha_v\beta_3$ blocking | [ <sup>68</sup> Ga]Ga- <b>1</b><br>+ EGFR blocking |
|-----------------|---------------------------------|--------------------------------------------------------------------------|----------------------------------------------------|
| small intestine | 1.20 ± 0.13                     | 0.23 ± 0.17                                                              | 0.99 ± 0.56                                        |
| large intestine | 1.32 ± 0.33                     | 0.42 ± 0.04                                                              | 0.92 ± 0.54                                        |
| stomach         | 1.23 ± 0.55                     | 0.27 ± 0.13                                                              | 0.96 ± 0.66                                        |
| spleen          | 0.98 ± 0.22                     | 0.13 ± 0.05                                                              | 1.10 ± 0.55                                        |
| pancreas        | 0.68 ± 0.17                     | 0.30 ± 0.28                                                              | 1.50 ± 1.23                                        |
| liver           | 1.24 ± 0.15                     | 0.19 ± 0.12                                                              | 1.25 ± 1.04                                        |
| kidneys         | 88.04 ± 28.51                   | 74.33 ± 32.40                                                            | 156.37 ± 65.46                                     |
| blood           | 4.49 ± 2.17                     | 1.38 ± 0.74                                                              | 4.56 ± 4.04                                        |
| heart           | 2.06 ± 0.82                     | 0.29 ± 0.14                                                              | 1.70 ± 1.17                                        |
| lung            | 2.32 ± 1.77                     | 0.48 ± 0.16                                                              | 2.25 ± 1.91                                        |
| brain           | 0.24 ± 0.18                     | 0.06 ± 0.05                                                              | 0.14 ± 0.08                                        |
| tumor           | 2.79 ± 1.66                     | 0.36 ± 0.20                                                              | 2.47 ± 1.75                                        |
| bone            | 0.84 ± 0.36                     | 0.17 ± 0.11                                                              | 0.70 ± 0.46                                        |
| muscle          | 0.64 ± 0.15                     | 0.09 ± 0.04                                                              | 0.39 ± 0.29                                        |
